# Supplementary material for: Expression of Renin-Angiotensin System Components in the Taste Organ of Mice
Source: PubMed Central journal article supplement (PMC6770651; doi:10.3390/nu11092251), 2019-09-19
Supplement: nutrients-11-02251-s001.pdf [file nutrients-11-02251-s001.pdf]

Supplemental table. Nucleotide sequences for the primers used in RT-PCR, *in situ* hybridization and qPCR experiments.

| Gene           | Accession No. | Analysis | Forward                 | Reverse                  | Region    |
|----------------|---------------|----------|-------------------------|--------------------------|-----------|
| Renin          | NM_031192     | RT-PCR   | aagaaggctgtgcggtagtg    | tcctatgtggggacaaag       | 868–1327  |
|                |               | ISH      | accttcagtctccaacacg     | tgtgcacagcttgtctctcc     | 87–1109   |
|                |               | qPCR     | ccgacattcctttgacctg     | tgtgcacagcttgtctctcc     | 1015–1109 |
| Agt            | NM_007428     | RT-PCR   | ccgaggatcctacaatctgc    | ctaggcacaaggcctcacac     | 1193–1510 |
|                |               | ISH      | ccccttccatctcctttacc    | cctctctgctttgagttcg      | 152–1344  |
| ACE1           | NM_207624     | RT-PCR   | accgagaacaggagacatgg    | aggaggaaggctcagctagg     | 3678–4075 |
|                |               | ISH      | atggaagcatcaccaaggag    | ctccttcccctctgtttcc      | 3283–4454 |
| ACE2           | NM_001130513  | RT-PCR   | tgatgtctttggcctgaatg    | ggaagatgacaagtgtcttgc    | 2466–2768 |
| TRPM5          | NM_020277     | RT-PCR   | caggaggcacactactcaagc   | atccagctgtccagtccaag     | 3458–3825 |
| $\beta$ -actin | NM_007393     | RT-PCR   | ggttccgatgccctgaggtc    | acttgcggtgcacgatggagg    | 840–1199  |
| $\alpha$ ENaC  | NM_011324     | ISH      | ctaataatgatctggaccacacc | aaagcgtctgttccgtgatgc    | 539–1094  |
| T1R3           | NM_031872     | ISH      | tgctgctatgactgcgtggac   | aagaagcacatagcacttggg    | 1583–2488 |
| PKD2L1         | NM_181422     | ISH      | gaaagagcgggtttctgatg    | ccctcagttccagctagtcg     | 1962–3159 |
| Gustducin      | NM_001081143  | qPCR     | agggcatctgaataccagctcaa | ctgatctctggccacctacatcaa | 533–728   |
| Keratin 8      | NM_031170     | qPCR     | tgaacaacaagttcgctcctt   | gctcctcgacgtcttctgct     | 414–523   |
| GAPDH          | NM_001289726  | qPCR     | tgtgtcctcgtggatctga     | ttgctgttgaagtcgcaggag    | 803–952   |

ISH: *in situ* hybridization; RT-PCR: reverse transcription-polymerase chain reaction; qPCR: quantitative polymerase chain reaction.
